# Supplementary material for: Enhanced Regulatory Sequence Prediction Using Gapped k-mer Features
Source: PubMed Central journal article supplement (PMC4102394; doi:10.1371/journal.pcbi.1003711), 2014-07-17

## ROC Curve

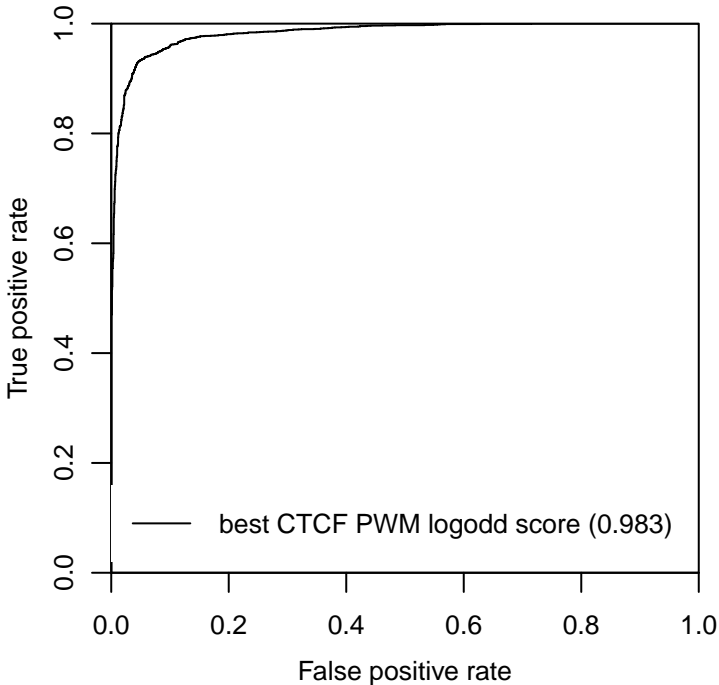

Supplement: pcbi.1003711.s002.pdf [file pcbi.1003711.s002.pdf]
