# Supplementary material for: Enhanced Regulatory Sequence Prediction Using Gapped k-mer Features
Source: PubMed Central journal article supplement (PMC4102394; doi:10.1371/journal.pcbi.1003711), 2014-07-17
Supplement: pcbi.1003711.s005.pdf [file pcbi.1003711.s005.pdf]

|                                        |                                                                                                           |                                                                                                         |                                                                                                            |
|----------------------------------------|-----------------------------------------------------------------------------------------------------------|---------------------------------------------------------------------------------------------------------|------------------------------------------------------------------------------------------------------------|
| BroadHistoneGm12878CtcfStd             | <br>CTCF (5.07e-04)         | <br>CTCF (1.9e-03)        | <br>CTCF (5.87e-06)         |
| BroadHistoneH1hes3CtcfStd              | <br>CTCF (3.57e-04)       | <br>CTCF (1.6e-02)      | <br>CTCF (2.59e-02)       |
| BroadHistoneHela3CtcfStd               | <br>CTCF (9.92e-05)      | <br>CTCF (3.13e-03)    | N/A                                                                                                        |
| BroadHistoneHela3Pol2bStd              | <br>N/A                  | <br>N/A                | <br>N/A                  |
| BroadHistoneHepg2CtcfStd               | <br>CTCF (1.04e-04)      | <br>CTCF (4.41e-03)    | N/A                                                                                                        |
| BroadHistoneHmecCtcfStd                | <br>CTCF (2.59e-04)      | <br>CTCF (2.28e-03)    | <br>CTCF (4.68e-07)      |
| BroadHistoneHsmmCtcfStd                | <br>CTCF (5e-05)         | <br>CTCF (1.27e-02)    | N/A                                                                                                        |
| BroadHistoneHsmtCtcfStd                | <br>CTCF (5.49e-04)      | <br>CTCF (1.63e-03)    | <br>CTCF (7.88e-03)      |
| BroadHistoneHuvecCtcfStd               | <br>CTCF (8.37e-05)      | <br>CTCF (1.85e-02)    | <br>CTCF (3.09e-06)      |
| BroadHistoneHuvecPol2bStd              | <br>AP1 (1.07e-06)       | <br>ETS1 (9.09e-08)    | <br>E2F4 (1.29e-02)      |
| BroadHistoneK562CtcfStd                | <br>CTCF (2.04e-04)      | <br>CTCF (1.8e-02)     | <br>CTCF (3.33e-05)      |
| BroadHistoneK562Pol2bStd               | <br>GATA1-ext (4.17e-08) | N/A                                                                                                     |                                                                                                            |
| BroadHistoneNhaCtcfStd                 | <br>CTCF (2.12e-04)      | <br>CTCF (9.65e-03)    | <br>CTCF (2.57e-06)      |
| BroadHistoneNhdfadCtcfStd              | <br>CTCF (2.23e-04)      | <br>CTCF (2.15e-03)    | <br>CTCF (7.36e-07)      |
| BroadHistoneNhekCtcfStd                | <br>CTCF (4.1e-05)       | <br>CTCF (3.5e-03)     | N/A                                                                                                        |
| BroadHistoneNhekPol2bStd               | <br>AP1 (2.69e-06)       | <br>EGR1 (3.72e-02)    | <br>GATA1-ext (1.49e-02) |
| BroadHistoneNhlfcTcfStd                | <br>CTCF (1.13e-04)     | <br>CTCF (1.98e-03)   | <br>CTCF (5.89e-04)     |
| BroadHistoneOsteoblCtcfStd             | <br>CTCF (2.93e-04)    | <br>CTCF (9.03e-03)  | <br>CTCF (2.03e-06)    |
| HaibTfbsA549CtcfPcr1xDexa              | <br>CTCF (1.53e-05)    | <br>CTCF (1.71e-03)  | N/A                                                                                                        |
| HaibTfbsA549CtcfPcr1xEtoh02            | <br>CTCF (2.68e-04)    | <br>CTCF (9.8e-04)   | <br>CTCF (1.21e-06)    |
| HaibTfbsA549GrPcr1xDexb                | <br>NR3C1 (1.38e-05)   | <br>AP1 (4.85e-06)   | <br>NR3C1 (7.22e-06)   |
| HaibTfbsA549GrPcr1xDexc                | <br>NR3C1 (1.25e-05)   | <br>AP1 (3.21e-06)   | <br>FOXA (1.52e-08)    |
| HaibTfbsA549GrPcr1xDexd                | <br>AP1 (2.53e-05)     | <br>NR3C1 (3.27e-03) | <br>FOXA (2.92e-04)    |
| HaibTfbsA549GrPcr2xDexa                | <br>NR3C1 (4.71e-08)   | <br>AP1 (2.6e-07)    | <br>ZNF281 (1.67e-04)  |
| HaibTfbsA549Pol2Pcr2xDexa              | <br>EGR1 (3.11e-04)    | N/A                                                                                                     | N/A                                                                                                        |
| HaibTfbsA549Pol2Pcr2xEtoh02            | <br>SP1 (2.26e-04)     | N/A                                                                                                     | N/A                                                                                                        |
| HaibTfbsA549Usf1Pcr1xDexa              | <br>USF (2.03e-05)     | <br>MAX (8.29e-06)   | <br>AP1 (2.62e-06)     |
| HaibTfbsA549Usf1Pcr1xEtoh02            | <br>USF (2.01e-06)     | <br>MAX (2.28e-05)   | <br>AP1 (5.98e-07)     |
| HaibTfbsEcc1EralphaaV0416102Estradia1h | <br>ESR1 (4.04e-08)    | <br>ESR1 (2.76e-03)  | <br>ESR1 (4.01e-05)    |

|                                   |                      |                          |                           |
|-----------------------------------|----------------------|--------------------------|---------------------------|
| HaibTfbsEcc1Foxa1c20V0416102Dmso2 | <br>FOXA (4.07e-07)  | <br>FOXA (5.79e-05)      | <br>FOXA (3.35e-10)       |
| HaibTfbsEcc1GrV0416102Dexa        | <br>NR3C1 (1.64e-05) | <br>UA9 (1.19e-03)       | <br>AP1 (1.2e-06)         |
| HaibTfbsEcc1Pol2V0416102Dmso2     | N/A                  | N/A                      | <br>E2F4 (9.94e-03)       |
| HaibTfbsGm12878Atf3Pcr1x          | <br>USF (1.3e-07)    | <br>GATA1-ext (3.83e-02) | <br>GATA1-ext (2.4e-02)   |
| HaibTfbsGm12878BatfPcr1x          | <br>AP1 (1.45e-03)   | N/A                      | <br>STAT2 (8.05e-08)      |
| HaibTfbsGm12878Bcl11aPcr1x        | <br>PU1 (1.12e-06)   | <br>AP1 (3.72e-04)       | <br>PU1 (3.6e-02)         |
| HaibTfbsGm12878Bcl3Pcr1x          | <br>NFKB1 (2.4e-04)  | <br>AP1 (2.22e-05)       | <br>PRDM1 (4.55e-03)      |
| HaibTfbsGm12878Bclaf1m33V0416101  | N/A                  | N/A                      |                           |
| HaibTfbsGm12878Ebf1c8Pcr1x        | <br>EBF1 (5.48e-03)  | <br>EBF1 (1.88e-05)      | <br>NFKB1 (8.59e-05)      |
| HaibTfbsGm12878EbfPcr1x           | <br>EBF1 (1.06e-03)  | <br>EBF1 (1.04e-02)      | <br>PU1 (1.35e-06)        |
| HaibTfbsGm12878Egr1Pcr2x          | <br>EGR1 (4.35e-06)  | <br>GATA1-ext (2.19e-02) | <br>GATA1-ext (7.85e-03)  |
| HaibTfbsGm12878Egr1V0416101       | <br>EGR1 (1.07e-06)  | <br>EGR1 (4.42e-04)      | <br>PU1 (3.95e-02)        |
| HaibTfbsGm12878Elf1sc631V0416101  | <br>ELF1 (1.68e-04)  | <br>ELF1 (7.21e-04)      | <br>CTCF (1.33e-02)       |
| HaibTfbsGm12878Ets1Pcr1x          | <br>ELF1 (4.1e-03)   | <br>UA1 (7.17e-03)       | <br>ZNF143-ext (5.72e-03) |
| HaibTfbsGm12878GabpPcr2x          | <br>ELF1 (4.1e-05)   | <br>ELF1 (2.01e-05)      | <br>ETS1 (4.68e-02)       |
| HaibTfbsGm12878Irf4m17Pcr1x       | <br>PU1 (6.48e-06)   | <br>AP1 (3.08e-03)       | <br>PU1 (1.57e-06)        |
| HaibTfbsGm12878Irf4Pcr1x          | <br>PU1 (6.48e-06)   | <br>AP1 (3.08e-03)       | <br>PU1 (1.57e-06)        |
| HaibTfbsGm12878Mef2aPcr1x         | <br>MEF2 (2.78e-06)  | <br>STAT2 (1.02e-05)     | <br>NFKB1 (4.99e-06)      |
| HaibTfbsGm12878Mef2csc13268Pcr1x  | <br>MEF2 (3.5e-05)   | <br>MEF2 (1.8e-07)       | <br>MEF2 (6.78e-03)       |
| HaibTfbsGm12878NrnfPcr2x          | <br>REST (8.04e-03)  | <br>REST (5.49e-08)      | <br>REST (5.24e-06)       |
| HaibTfbsGm12878Oct2Pcr1x          | <br>POU2F2 (5.4e-06) | <br>PU1 (5.81e-04)       | N/A                       |
| HaibTfbsGm12878P300Pcr1x          | <br>PU1 (3.78e-06)   | <br>NFKB1 (2.66e-08)     | <br>AP1 (3.61e-05)        |
| HaibTfbsGm12878Pax5c20Pcr1x       | <br>PAX5 (4.56e-02)  | <br>STAT2 (2.79e-03)     | <br>CTCF (3.7e-07)        |
| HaibTfbsGm12878Pax5n19Pcr1x       | <br>PU1 (4.6e-07)    | <br>PRDM1 (4.94e-02)     | <br>AP1 (2.84e-02)        |
| HaibTfbsGm12878Pbx3Pcr1x          | <br>UA2 (1.53e-03)   | <br>UA2 (1.22e-03)       | <br>UA2 (1.1e-02)         |
| HaibTfbsGm12878Pol24h8Pcr1x       | N/A                  | <br>ZNF281 (2.61e-03)    | <br>STAT2 (2.07e-05)      |
| HaibTfbsGm12878Pol2Pcr2x          | N/A                  | <br>EGR1 (8.6e-03)       | N/A                       |
| HaibTfbsGm12878Pou2f2Pcr1x        | <br>POU2F2 (3.8e-06) | <br>PU1 (5.79e-04)       | N/A                       |
| HaibTfbsGm12878Pu1Pcr1x           | <br>PU1 (1.77e-06)   | <br>PU1 (1.37e-04)       | <br>PU1 (2.13e-03)        |

|                                    |                       |                  |                      |
|------------------------------------|-----------------------|------------------|----------------------|
| HaibTfbsGm12878RrxrPcr1x           | CTCF (2.33e-09)       | N/A              | CTCF (1.54e-04)      |
| HaibTfbsGm12878Sin3ak20Pcr1x       | N/A                   | AP1 (2.96e-02)   | N/A                  |
| HaibTfbsGm12878Six5Pcr1x           | ZNF143-ext (1.07e-10) | ELF1 (1.55e-03)  | YY1 (2.35e-02)       |
| HaibTfbsGm12878Sp1Pcr1x            | PU1 (2.75e-03)        | SP1 (1.03e-09)   | PU1 (2.71e-05)       |
| HaibTfbsGm12878SrfPcr2x            | SRF (2.49e-06)        | SRF (4.24e-03)   | ELF1 (2.42e-04)      |
| HaibTfbsGm12878SrfV0416101         | SRF (8.39e-07)        | SRF (4.19e-02)   | SRF (4.15e-04)       |
| HaibTfbsGm12878Taf1Pcr1x           | YY1 (3.18e-07)        | ELF1 (2.91e-04)  | GATA1-ext (1.74e-02) |
| HaibTfbsGm12878Tcf12Pcr1x          | TCF12 (8.55e-12)      | PU1 (7.38e-05)   | NFKB1 (1.01e-02)     |
| HaibTfbsGm12878Usf1Pcr2x           | USF (7.44e-06)        | MAX (6.73e-05)   | USF (3.7e-04)        |
| HaibTfbsGm12878Yy1V0416101         | CTCF (2.63e-06)       | YY1 (4e-10)      | YY1 (3e-03)          |
| HaibTfbsGm12878Zbtb33Pcr1x         | UA1 (1.26e-07)        | N/A              |                      |
| HaibTfbsGm12878Zeb1sc25388V0416102 | N/A                   | MYC (4.98e-02)   | N/A                  |
| HaibTfbsGm12891Oct2Pcr1x           | POU2F2 (2.47e-05)     | ETS1 (4.22e-02)  | POU2F2 (1.61e-05)    |
| HaibTfbsGm12891Pax5c20Pcr1x        | PAX5 (3.27e-04)       | PAX5 (3.05e-07)  | AP1 (1.57e-05)       |
| HaibTfbsGm12891Pol24h8Pcr1x        | N/A                   | N/A              | N/A                  |
| HaibTfbsGm12891Pol2Pcr1x           | ETS1 (1.74e-02)       | N/A              | GATA1-ext (3.28e-02) |
| HaibTfbsGm12891Pou2f2Pcr1x         | POU2F2 (2.16e-05)     | PRDM1 (2.14e-02) | POU2F2 (1.6e-05)     |
| HaibTfbsGm12891Pu1Pcr1x            | PU1 (8.99e-07)        | STAT2 (3.64e-04) | PU1 (1.62e-03)       |
| HaibTfbsGm12891Taf1Pcr1x           | YY1 (2.53e-03)        | ELF1 (2.31e-04)  | N/A                  |
| HaibTfbsGm12891Yy1c20V0416101      | YY1 (7.98e-07)        | CTCF (3.22e-07)  | YY1 (2.18e-04)       |
| HaibTfbsGm12892Pax5c20Pcr1x        | PAX5 (3.62e-08)       | N/A              | N/A                  |
| HaibTfbsGm12892Pol24h8Pcr1x        | N/A                   | N/A              | N/A                  |
| HaibTfbsGm12892Pol24h8V0416102     | N/A                   | N/A              | N/A                  |
| HaibTfbsGm12892Pol2Pcr1x           | ELF1 (7.36e-04)       | N/A              |                      |
| HaibTfbsGm12892Pol2V0416102        | ETS1 (1.79e-03)       | STAT2 (5.69e-04) |                      |
| HaibTfbsGm12892Taf1Pcr1x           | YY1 (4.5e-04)         | E2F4 (3.3e-03)   | ELF1 (2.89e-04)      |
| HaibTfbsGm12892Taf1V0416102        | YY1 (2.41e-04)        | ELF1 (1.33e-05)  | N/A                  |
| HaibTfbsGm12892Yy1V0416101         | YY1 (2.4e-06)         | YY1 (1.46e-03)   | N/A                  |
| HaibTfbsH1hescAtf3Pcr1x            | USF (4.82e-05)        | CREB (3.72e-03)  | CTCF (2.2e-11)       |

|                                    |                       |                       |                      |
|------------------------------------|-----------------------|-----------------------|----------------------|
| HaibTfbsH1hescBcl3Pcr1x            | REST (3.78e-02)       | N/A                   | N/A                  |
| HaibTfbsH1hescCtcfsc5916V0416102   | CTCF (4.69e-05)       | CTCF (6.18e-03)       | CTCF (3.95e-04)      |
| HaibTfbsH1hescEgr1V0416101         | EGR1 (8.08e-06)       | EGR1 (2.33e-02)       | GATA1-ext (2.56e-02) |
| HaibTfbsH1hescEgr1V0416102         | EGR1 (6.78e-06)       | EGR1 (2.83e-02)       | GATA1-ext (5e-03)    |
| HaibTfbsH1hescGapbPcr1x            | CTCF (1.69e-05)       | ELF1 (2.67e-06)       | CTCF (2.48e-03)      |
| HaibTfbsH1hescHdac2sc6296V0416102  | GATA1-ext (3.65e-02)  | GATA1-ext (1.11e-02)  | POU2F2 (1.76e-04)    |
| HaibTfbsH1hescJundV0416102         | AP1 (1.68e-04)        | v-JUN (6.2e-05)       | N/A                  |
| HaibTfbsH1hescNanogsc33759V0416102 | UA9 (1.03e-04)        | UA9 (3.86e-02)        | SOX2-OCT4 (1.79e-12) |
| HaibTfbsH1hescNrsfPcr1x            | REST (1.59e-02)       | REST (1.19e-06)       | REST (6.53e-06)      |
| HaibTfbsH1hescNrsfV0416102         | REST (1.63e-02)       | REST (7.17e-07)       | REST (6.09e-06)      |
| HaibTfbsH1hescP300Pcr1x            | N/A                   | N/A                   | SOX2-OCT4 (3.39e-02) |
| HaibTfbsH1hescPol24h8Pcr1x         | N/A                   | N/A                   |                      |
| HaibTfbsH1hescPol24h8V0416102      | N/A                   | N/A                   |                      |
| HaibTfbsH1hescPol2Pcr1x            | EGR1 (3.41e-02)       | N/A                   | N/A                  |
| HaibTfbsH1hescPol2V0416102         | EGR1 (4.68e-02)       | N/A                   | N/A                  |
| HaibTfbsH1hescPou5f1sc9081V0416102 | SOX2-OCT4 (1.88e-06)  | POU2F2 (6.47e-05)     | SOX2-OCT4 (9.6e-06)  |
| HaibTfbsH1hescRad21V0416102        | CTCF (4.48e-06)       | CTCF (3.27e-03)       | CTCF (1.21e-04)      |
| HaibTfbsH1hescRxraV0416102         | CTCF (5.24e-09)       | RXRA (1.41e-03)       | RXRA (9.26e-07)      |
| HaibTfbsH1hescSin3ak20Pcr1x        | REST (1.81e-03)       | REST (6.31e-04)       | N/A                  |
| HaibTfbsH1hescSix5Pcr1x            | ZNF143-ext (4.65e-08) | ZNF143-ext (1.11e-04) | GATA1-ext (4.16e-02) |
| HaibTfbsH1hescSp1Pcr1x             | ZNF281 (1.6e-04)      | NFY (9.83e-10)        | N/A                  |
| HaibTfbsH1hescSrfPcr1x             | SRF (5.42e-06)        | SRF (1.52e-02)        | SRF (3.17e-02)       |
| HaibTfbsH1hescTaf1Pcr1x            | SP1 (4.97e-03)        | N/A                   | N/A                  |
| HaibTfbsH1hescTaf1V0416102         | EGR1 (2.52e-02)       | GATA1-ext (2.01e-02)  | UA7 (1.27e-02)       |
| HaibTfbsH1hescTaf7sq8V0416102      | N/A                   | N/A                   |                      |
| HaibTfbsH1hescTcf12Pcr1x           | ZEB1 (5.18e-06)       | ZNF281 (4.73e-05)     | N/A                  |
| HaibTfbsH1hescUsf1Pcr1x            | USF (6.69e-03)        | USF (2.48e-05)        | N/A                  |
| HaibTfbsH1hescYy1c20Pcr1x          | YY1 (1.75e-05)        | YY1 (7.38e-03)        | CTCF (8.56e-08)      |
| HaibTfbsHct116Pol24h8V0416101      | AP1 (1.25e-07)        | SP1 (2.56e-08)        | ELF1 (9.01e-04)      |

|                                  |                    |                      |                      |
|----------------------------------|--------------------|----------------------|----------------------|
| HaibTfbsHelas3NrsfPcr1x          | REST (1.09e-02)    | REST (5.77e-07)      | REST (3.91e-06)      |
| HaibTfbsHelas3Pol2Pcr1x          | AP1 (8.31e-08)     | N/A                  | N/A                  |
| HaibTfbsHelas3Taf1Pcr1x          | N/A                | AP1 (2.99e-07)       | ETS1 (3.65e-03)      |
| HaibTfbsHepg2Atf3Pcr1x           | USF (4.23e-06)     | CREB (2.12e-03)      | CREB (3.15e-03)      |
| HaibTfbsHepg2Bhlhe40V0416101     | BHLHE40 (6.94e-05) | FOXA (1.08e-03)      |                      |
| HaibTfbsHepg2CtcfV0416101        | CTCF (1.84e-05)    | CTCF (3.89e-03)      | CTCF (8.16e-05)      |
| HaibTfbsHepg2Elf1sc631V0416101   | ELF1 (1.57e-03)    | ELF1 (6.27e-05)      | ETS1 (9.38e-03)      |
| HaibTfbsHepg2Fosl2Pcr1x          | AP1 (2.36e-04)     | AP1 (9.12e-07)       | FOXA (1.46e-07)      |
| HaibTfbsHepg2Foxa1c20Pcr1x       | FOXA (9.65e-08)    | FOXA (1.68e-06)      | FOXA (7.16e-10)      |
| HaibTfbsHepg2Foxa1sc101058Pcr1x  | FOXA (2.06e-05)    | FOXA (8.92e-03)      | FOXA (1.09e-04)      |
| HaibTfbsHepg2Foxa2sc6554V0416101 | FOXA (1.85e-08)    | FOXA (1.32e-06)      | FOXA (1.03e-08)      |
| HaibTfbsHepg2GabpPcr2x           | ELF1 (3.04e-06)    | ELF1 (5.08e-03)      |                      |
| HaibTfbsHepg2Hdac2sc6296V0416101 | HNF4 (1.51e-09)    | FOXA (4.16e-08)      | HNF4 (2.5e-04)       |
| HaibTfbsHepg2Hey1V0416101        | N/A                | HNF4 (1.78e-06)      | GATA1-ext (4.53e-02) |
| HaibTfbsHepg2Hnf4ah171Pcr1x      | HNF4 (4.1e-05)     | HNF4 (5.54e-04)      | RXRA (2.42e-07)      |
| HaibTfbsHepg2Hnf4gsc6558V0416101 | HNF4 (1.03e-05)    | HNF4 (1.03e-04)      | RXRA (9.88e-07)      |
| HaibTfbsHepg2JundPcr1x           | AP1 (2.73e-04)     | HNF4 (4.92e-05)      | AP1 (7.73e-05)       |
| HaibTfbsHepg2NrsfPcr2x           | REST (1.53e-02)    | REST (7.87e-08)      | REST (6.11e-06)      |
| HaibTfbsHepg2P300Pcr1x           | HNF4 (4.25e-09)    | FOXA (3.56e-05)      | FOXA (8.37e-05)      |
| HaibTfbsHepg2P300V0416101        | HNF4 (1.61e-10)    | FOXA (3.46e-07)      | TCF7L2 (4.85e-04)    |
| HaibTfbsHepg2Pol2Pcr2x           | SP1 (4.2e-04)      | GATA1-ext (9.96e-03) | RXRA (2.9e-04)       |
| HaibTfbsHepg2Rad21V0416101       | CTCF (6.63e-06)    | CTCF (2.01e-03)      | CTCF (3.17e-07)      |
| HaibTfbsHepg2RrxraPcr1x          | RXRA (2.84e-05)    | NR2C2 (7.75e-04)     | FOXA (9.25e-13)      |
| HaibTfbsHepg2Sin3ak20Pcr1x       | A-Box (3.61e-02)   | ELF1 (1.53e-03)      | HNF4 (6.46e-08)      |
| HaibTfbsHepg2Sp1Pcr1x            | HNF4 (6.9e-06)     | N/A                  | RXRA (3.4e-02)       |
| HaibTfbsHepg2SrfV0416101         | SRF (1.67e-08)     | SRF (4.81e-02)       | SRF (1.15e-02)       |
| HaibTfbsHepg2Taf1Pcr2x           | N/A                | NFY (3.53e-02)       |                      |
| HaibTfbsHepg2Tcf12Pcr1x          | HNF4 (1.51e-05)    | FOXA (3.82e-06)      | TCF7L2 (2.41e-03)    |
| HaibTfbsHepg2Usf1Pcr1x           | USF (2.14e-06)     | MAX (1.56e-05)       | USF (6.62e-03)       |

|                                 |                           |                           |                          |
|---------------------------------|---------------------------|---------------------------|--------------------------|
| HaibTfbsHepg2Zbtb33V0416101     | <br>UA1 (2.71e-08)        | <br>GATA1-ext (3.53e-02)  | <br>FOXA (3.25e-04)      |
| HaibTfbsHtb11NrnfPcr2x          | <br>REST (1.76e-07)       | <br>REST (3.41e-03)       | <br>REST (2.08e-06)      |
| HaibTfbsK562Bcl3Pcr1x           | <br>GATA1-ext (9.91e-06)  | N/A                       | <br>TBP (5.85e-03)       |
| HaibTfbsK562Bclaf1m33Pcr1x      | <br>GATA1-ext (1.1e-02)   | <br>RFX5 (1.14e-03)       | <br>TBP (2.31e-02)       |
| HaibTfbsK562Ctcfsc98982V0416101 | <br>CTCF (5.4e-04)        | <br>CTCF (2.19e-02)       | <br>CTCF (1.13e-03)      |
| HaibTfbsK562E2f6h50V0416102     | <br>MYC (5.06e-07)        | <br>E2F4 (1.1e-06)        | N/A                      |
| HaibTfbsK562Egr1V0416101        | <br>EGR1 (6.34e-06)       | <br>EGR1 (4.39e-04)       | N/A                      |
| HaibTfbsK562Elf1sc631V0416102   | <br>ELF1 (1.62e-03)       | <br>ELF1 (9.53e-06)       | <br>ELF1 (7.19e-05)      |
| HaibTfbsK562Ets1V0416101        | <br>ELF1 (4.99e-03)       | <br>ZNF143-ext (4.45e-03) | <br>NFE2 (1.47e-03)      |
| HaibTfbsK562Fosl1sc183V0416101  | <br>AP1 (2.23e-05)        | <br>AP1 (1.8e-06)         | <br>E2F4 (2.91e-03)      |
| HaibTfbsK562GapbV0416101        | <br>ELF1 (1.54e-05)       | <br>GATA1-ext (3.59e-12)  | N/A                      |
| HaibTfbsK562Gata2cg2Pcr1x       | <br>GATA1-ext (3.75e-07)  | <br>NFE2 (1.35e-06)       | <br>GATA1-ext (3.23e-08) |
| HaibTfbsK562Hdac2sc6296V0416102 | <br>GATA1-ext (1.55e-08)  | <br>AP1 (1.18e-06)        | N/A                      |
| HaibTfbsK562Hey1Pcr1x           | N/A                       | <br>ELF1 (4.54e-03)       |                          |
| HaibTfbsK562MaxV0416102         | <br>MAX (3.42e-06)        | <br>AP1 (1.72e-06)        | <br>GATA1-ext (9.25e-05) |
| HaibTfbsK562NrnfV0416102        | <br>REST (4.18e-07)       | <br>REST (6.99e-03)       | <br>REST (6.75e-06)      |
| HaibTfbsK562Pol24h8Pcr1x        | N/A                       | N/A                       | N/A                      |
| HaibTfbsK562Pol24h8V0416101     | <br>GATA1-ext (2.69e-10)  | <br>NFE2 (4.12e-04)       | <br>ELF1 (1.25e-02)      |
| HaibTfbsK562Pol2V0416101        | <br>EGR1 (1.4e-02)        | <br>GATA1-ext (2.66e-09)  | <br>ELF1 (1.43e-02)      |
| HaibTfbsK562Pu1Pcr1x            | <br>PU1 (3.87e-05)        | <br>UA5 (1.31e-02)        | <br>PU1 (3.71e-06)       |
| HaibTfbsK562Rad21V0416102       | <br>CTCF (1.11e-05)       | <br>CTCF (1.19e-02)       | <br>CTCF (4.34e-04)      |
| HaibTfbsK562Sin3ak20V0416101    | <br>MYC (3.67e-04)        | <br>E2F4 (1.25e-02)       | <br>GATA1-ext (1.77e-02) |
| HaibTfbsK562Six5Pcr1x           | <br>ZNF143-ext (6.54e-09) | N/A                       | <br>MYC (4.87e-02)       |
| HaibTfbsK562Sp1Pcr1x            | <br>SP1 (9.07e-06)        | <br>NFY (2.86e-08)        | <br>E2F4 (3.73e-02)      |
| HaibTfbsK562Sp2sc643V0416102    | <br>NFY (4.95e-09)        | N/A                       | N/A                      |
| HaibTfbsK562SrfV0416101         | <br>SRF (1.25e-06)        | <br>SRF (1.23e-02)        | <br>AP1 (9.42e-07)       |
| HaibTfbsK562Taf1Pcr1x           | N/A                       | N/A                       | <br>ETS1 (3.62e-02)      |
| HaibTfbsK562Taf1V0416101        | N/A                       | <br>AP1 (7.81e-05)        | N/A                      |
| HaibTfbsK562Taf7sq8V0416101     | <br>GATA1-ext (1.09e-03)  |                           |                          |

|                                        |                                                                                                         |                                                                                                             |                                                                                                              |
|----------------------------------------|---------------------------------------------------------------------------------------------------------|-------------------------------------------------------------------------------------------------------------|--------------------------------------------------------------------------------------------------------------|
| HaibTfbsK562Usf1V0416101               | <br>USF (6.36e-05)        | <br>MAX (1.7e-06)             | <br>USF (1.82e-03)            |
| HaibTfbsK562Yy1V0416101                | <br>YY1 (1.2e-07)       | <br>CTCF (3.27e-12)         | <br>YY1 (5.98e-05)          |
| HaibTfbsK562Yy1V0416102                | <br>YY1 (1.42e-06)     | <br>YY1 (7.1e-03)          | <br>AP1 (1.43e-02)         |
| HaibTfbsK562Zbtb33Pcr1x                | <br>UA1 (9.71e-05)     | <br>TBP (1.1e-02)          | <br>E2F4 (3.07e-02)        |
| HaibTfbsK562Zbtb7asc34508V0416101      | <br>CTCF (7.08e-06)    | <br>NFE2 (7.21e-06)        | <br>UA3 (4.32e-05)         |
| HaibTfbsPanc1NrsfPcr2x                 | <br>REST (1.73e-02)    | <br>REST (7.63e-08)        | <br>REST (1.27e-05)        |
| HaibTfbsPfsk1NrsfPcr2x                 | <br>REST (1.27e-02)    | <br>REST (9.89e-08)        | <br>REST (1.1e-05)         |
| HaibTfbsSknshraCtcfV0416102            | <br>CTCF (1.63e-05)    | <br>CTCF (4.16e-03)        | <br>CTCF (1.76e-06)        |
| HaibTfbsSknshraP300V0416102            | <br>AP1 (8.05e-05)     | <br>N/A                    | <br>N/A                    |
| HaibTfbsSknshraRad21V0416102           | <br>CTCF (1.39e-05)    | <br>CTCF (5.53e-05)        | <br>CTCF (8.25e-08)        |
| HaibTfbsSknshraUsf1sc8983V0416102      | <br>USF (6.19e-04)     | <br>MAX (3.55e-06)         | <br>USF (1.29e-02)         |
| HaibTfbsSknshraYy1c20V0416102          | <br>YY1 (4.18e-06)     | <br>YY1 (1.29e-04)         | <br>CTCF (2.64e-07)        |
| HaibTfbsT47dCtcfsc5916V0416102Dmso2    | <br>CTCF (1.11e-05)    | <br>CTCF (4.07e-04)        | <br>CTCF (4.42e-07)        |
| HaibTfbsT47dEralphaaPcr2xGen1h         | <br>ESR1 (9.24e-08)    | <br>FOXA (1.07e-06)        | <br>ESR1 (7.58e-08)        |
| HaibTfbsT47dEralphaaV0416102Estradia1h | <br>ESR1 (1.33e-07)    | <br>FOXA (1.51e-09)        | <br>ESR1 (2e-04)           |
| HaibTfbsT47dFoxa1c20V0416102Dmso2      | <br>FOXA (3.26e-07)    | <br>FOXA (1.72e-06)        | <br>FOXA (1.51e-08)        |
| HaibTfbsT47dGata3sc268V0416102Dmso2    | <br>GATA1 (3.1e-04)    | <br>GATA1 (1.61e-03)       | <br>FOXA (1.41e-12)        |
| HaibTfbsT47dP300V0416102Dmso2          | <br>FOXA (1.41e-12)    | <br>TEAD1 (1.42e-03)       | <br>AP2 (2.18e-05)         |
| HaibTfbsU87NrsfPcr2x                   | <br>REST (1.48e-02)   | <br>REST (9.88e-08)       | <br>REST (1.04e-05)       |
| OpenChromChipFibroblCtcf               | <br>CTCF (1.28e-05)  | <br>CTCF (2.35e-03)      | <br>N/A                  |
| OpenChromChipGlioblaCtcf               | <br>CTCF (1.79e-04)  | <br>CTCF (3.64e-03)      | <br>CTCF (6.63e-06)      |
| OpenChromChipGlioblaPol2               | <br>N/A              | <br>GATA1-ext (2.09e-02) | <br>N/A                  |
| OpenChromChipGm12878Cmyc               | <br>MYC (6.15e-09)   | <br>GATA1-ext (1.39e-02) | <br>GATA1-ext (2.02e-03) |
| OpenChromChipGm12878Ctcf               | <br>CTCF (1.99e-04)  | <br>CTCF (7.27e-03)      | <br>CTCF (1.64e-07)      |
| OpenChromChipGm12878Pol2               | <br>A-Box (4.96e-02) | <br>N/A                  | <br>N/A                  |
| OpenChromChipHelas3Cmyc                | <br>MYC (6.53e-09)   | <br>E2F4 (7.81e-03)      | <br>GATA1-ext (1.2e-02)  |
| OpenChromChipHelas3Ctcf                | <br>CTCF (1.94e-05)  | <br>CTCF (3.82e-03)      | <br>CTCF (1.92e-06)      |
| OpenChromChipHelas3Pol2                | <br>SP1 (6.12e-03)   | <br>N/A                  | <br>N/A                  |
| OpenChromChipHepg2Cmyc                 | <br>MYC (8.4e-06)    | <br>GATA1-ext (4.4e-04)  | <br>GATA1-ext (3.22e-05) |

|                               |                          |                          |                          |
|-------------------------------|--------------------------|--------------------------|--------------------------|
| OpenChromChipHepg2Pol2        | <br>EGR1 (1.31e-03)      | <br>ESR1 (4.93e-02)      | <br>GATA1-ext (2.66e-02) |
| OpenChromChipHuvecCmyc        | <br>MYC (2.98e-10)       | <br>AP1 (1.17e-05)       | <br>ETS1 (8.57e-04)      |
| OpenChromChipHuvecCtcf        | <br>CTCF (2.09e-04)      | <br>CTCF (1.41e-02)      | <br>CTCF (4.55e-04)      |
| OpenChromChipHuvecPol2        | N/A                      | <br>ETS1 (2.69e-03)      | N/A                      |
| OpenChromChipK562Cmyc         | <br>MYC (1e-06)          | N/A                      | <br>GATA1-ext (4.26e-13) |
| OpenChromChipK562Ctcf         | <br>CTCF (2.39e-05)      | <br>CTCF (3.78e-03)      | <br>CTCF (3.4e-06)       |
| OpenChromChipK562Pol2         | <br>EGR1 (1.59e-03)      | N/A                      | N/A                      |
| OpenChromChipMcf7CmycEstro    | <br>MYC (9.69e-07)       | <br>TBP (4.62e-02)       | <br>RFX5 (4.15e-02)      |
| OpenChromChipMcf7CmycVeh      | <br>MYC (7.59e-06)       | <br>GATA1-ext (4.45e-02) | <br>AP1 (7.12e-06)       |
| OpenChromChipMcf7Ctcf         | <br>CTCF (1.09e-04)      | <br>CTCF (3.03e-03)      | <br>CTCF (3.06e-03)      |
| OpenChromChipMcf7CtcfEstro    | <br>CTCF (4.57e-05)      | <br>CTCF (1.3e-03)       | <br>CTCF (5.02e-05)      |
| OpenChromChipMcf7CtcfVeh      | <br>CTCF (2.06e-05)      | <br>CTCF (1.05e-03)      | <br>CTCF (5.33e-06)      |
| OpenChromChipMcf7Pol2         | N/A                      | N/A                      | N/A                      |
| OpenChromChipProgfibCtcf      | <br>CTCF (1.87e-04)      | <br>CTCF (1.68e-03)      | <br>CTCF (2.14e-07)      |
| OpenChromChipProgfibPol2      | N/A                      | N/A                      | N/A                      |
| SydhTfbsGm10847Nfklggrab      | <br>NFKB1 (3.49e-03)     | <br>NFKB1 (2.18e-03)     | <br>NFKB1 (3.64e-03)     |
| SydhTfbsGm10847Pol2lggmus     | N/A                      | <br>E2F4 (2.22e-02)      | N/A                      |
| SydhTfbsGm12878CfosStd        | <br>USF (1.21e-04)       | <br>NFY (7.93e-10)       | <br>NFY (6.06e-07)       |
| SydhTfbsGm12878Chd21250lggmus | <br>ZNF281 (5.15e-05)    | <br>UA1 (3.63e-08)       | <br>PU1 (2.42e-03)       |
| SydhTfbsGm12878Ctcf20Std      | <br>CTCF (3.86e-05)      | <br>CTCF (3.46e-04)      | <br>CTCF (2.75e-04)      |
| SydhTfbsGm12878EbfStd         | <br>EBF1 (4.45e-03)      | <br>EBF1 (5.51e-03)      | <br>NFKB1 (1.07e-04)     |
| SydhTfbsGm12878Irf3Std        | <br>GATA1-ext (1.28e-03) | <br>GATA1-ext (3.74e-06) |                          |
| SydhTfbsGm12878JundStd        | <br>AP1 (2.64e-03)       | N/A                      | N/A                      |
| SydhTfbsGm12878MaxStd         | <br>MAX (3.03e-11)       | <br>GATA1-ext (9.14e-04) | N/A                      |
| SydhTfbsGm12878Nfe2hStd       | <br>USF (3.44e-07)       | <br>GATA1-ext (2.83e-03) | <br>GATA1-ext (8.47e-03) |
| SydhTfbsGm12878Nfklggrab      | <br>NFKB1 (4.43e-03)     | <br>NFKB1 (1.09e-06)     | <br>PU1 (6.63e-06)       |
| SydhTfbsGm12878NfkbTnfStd     | <br>NFKB1 (2.31e-03)     | <br>NFKB1 (2.67e-05)     | <br>PU1 (6.63e-06)       |
| SydhTfbsGm12878Nrf1lggmus     | <br>NRF1 (3.62e-06)      | <br>NRF1 (1.03e-04)      | N/A                      |
| SydhTfbsGm12878P300n15Std     | <br>GATA1-ext (1.55e-02) | <br>E2F4 (3.78e-03)      |                          |



|                                  |                                                                                                           |                                                                                                             |                                                                                                              |
|----------------------------------|-----------------------------------------------------------------------------------------------------------|-------------------------------------------------------------------------------------------------------------|--------------------------------------------------------------------------------------------------------------|
| SydhTfbsGm12878Pol2Std           | N/A                                                                                                       | N/A                                                                                                         | N/A                                                                                                          |
| SydhTfbsGm12878Rad21Iggrab       | <br>CTCF (2.16e-06)       | <br>CTCF (4.74e-04)         | <br>CTCF (1.73e-07)         |
| SydhTfbsGm12878Rfx5n494Iggmus    | <br>RFX5 (1.68e-08)      | <br>NFY (1.56e-05)         | <br>NFY-UA2 (2.07e-04)     |
| SydhTfbsGm12878Smc3ab9263Iggmus  | <br>CTCF (3.02e-07)      | <br>CTCF (1.36e-02)        | <br>CTCF (3.68e-09)        |
| SydhTfbsGm12878TbpIggmus         | <br>PU1 (2.21e-04)       | <br>PU1 (2.41e-03)         | <br>NFKB1 (5.76e-05)       |
| SydhTfbsGm12878Tr4Std            | <br>NR2C2 (8.76e-09)     | <br>GATA1-ext (2.81e-03)   | <br>RXRA (1.55e-05)        |
| SydhTfbsGm12878Usf2Iggmus        | <br>USF (4.41e-06)       | <br>MAX (4.28e-06)         | <br>USF (3.98e-04)         |
| SydhTfbsGm12878Whiplggmus        | <br>GATA1-ext (1.55e-03) | <br>GATA1-ext (5.55e-03)   | <br>GATA1-ext (1.81e-03)   |
| SydhTfbsGm12878Yy1Std            | <br>YY1 (1.32e-04)       | <br>YY1 (8.62e-03)         | <br>UA4 (5e-03)            |
| SydhTfbsGm12878Znf143166181apStd | <br>CTCF (3.37e-05)      | <br>CTCF (1.26e-03)        | <br>CTCF (8.05e-04)        |
| SydhTfbsGm12878Zzz3Std           | N/A                                                                                                       | <br>GATA1-ext (4.15e-04)   | <br>GATA1-ext (1.11e-02)   |
| SydhTfbsGm12891Nfklggrab         | <br>NFKB1 (2.41e-03)     | <br>NFKB1 (4.42e-07)       | <br>STAT2 (6.02e-05)       |
| SydhTfbsGm12891Pol2Iggmus        | <br>ELF1 (1.63e-03)      | <br>N/A                    | <br>POU2F2 (5.26e-07)      |
| SydhTfbsGm12892Nfklggrab         | <br>NFKB1 (3.06e-03)     | <br>NFKB1 (7.15e-09)       | <br>PRDM1 (2.14e-03)       |
| SydhTfbsGm12892Pol2Iggmus        | N/A                                                                                                       | N/A                                                                                                         | N/A                                                                                                          |
| SydhTfbsGm15510Nfklggrab         | <br>NFKB1 (1.37e-03)     | <br>NFKB1 (7.4e-06)        | <br>STAT2 (2.47e-05)       |
| SydhTfbsGm15510Pol2Iggmus        | N/A                                                                                                       | <br>E2F4 (2.23e-02)        | <br>E2F4 (1.87e-02)        |
| SydhTfbsGm18505Nfklggrab         | <br>NFKB1 (4.57e-03)    | <br>NFKB1 (1.73e-03)      | <br>NFKB1 (5.87e-05)      |
| SydhTfbsGm18505Pol2Iggmus        | <br>ELF1 (6.4e-03)     | <br>STAT2 (2.39e-02)     | <br>TBP (4.08e-02)       |
| SydhTfbsGm18526Nfklggrab         | <br>NFKB1 (4.68e-04)   | <br>NFKB1 (8.63e-03)     | <br>EGR1 (3.67e-02)      |
| SydhTfbsGm18526Pol2Iggmus        | <br>NFKB1 (3.91e-02)   | <br>E2F4 (4.7e-02)       | N/A                                                                                                          |
| SydhTfbsGm18951Nfklggrab         | <br>NFKB1 (2.62e-03)   | <br>NFKB1 (1.04e-07)     | <br>STAT2 (1.14e-04)     |
| SydhTfbsGm18951Pol2Iggmus        | <br>A-Box (4.37e-02)   | <br>ELF1 (3.77e-04)      | <br>GATA1-ext (1.81e-02) |
| SydhTfbsGm19099Nfklggrab         | <br>NFKB1 (5.1e-03)    | <br>NFKB1 (1.93e-03)     | <br>NFKB1 (3.33e-03)     |
| SydhTfbsGm19099Pol2Iggmus        | N/A                                                                                                       | N/A                                                                                                         | N/A                                                                                                          |
| SydhTfbsGm19193Nfklggrab         | <br>NFKB1 (2.82e-03)   | <br>NFKB1 (4.04e-05)     | <br>STAT2 (2.48e-04)     |
| SydhTfbsGm19193Pol2Iggmus        | N/A                                                                                                       | N/A                                                                                                         | N/A                                                                                                          |
| SydhTfbsH1hesccJunIggrab         | <br>v-JUN (3.01e-06)   | <br>AP1 (4.85e-06)       | N/A                                                                                                          |
| SydhTfbsH1hesccTbp2Ucd           | <br>EGR1 (7.9e-03)     | <br>GATA1-ext (4.39e-02) | <br>GATA1-ext (9.86e-04) |

|                               |                          |                          |                          |
|-------------------------------|--------------------------|--------------------------|--------------------------|
| SydhTfbsH1hescNrf1Iggrab      | <br>NRF1 (6.01e-07)      | <br>NRF1 (2.34e-05)      | <br>NRF1 (3.12e-02)      |
| SydhTfbsH1hescRad21Iggrab     | <br>CTCF (2.88e-05)      | <br>CTCF (2.83e-03)      | <br>CTCF (2.06e-02)      |
| SydhTfbsH1hescRfx5n494Iggrab  | <br>RFX5 (2.66e-04)      | <br>NFY (1.89e-03)       | <br>RFX5 (3.86e-07)      |
| SydhTfbsH1hescSuz12Ucd        | <br>GATA1-ext (1.87e-02) | <br>E2F4 (4.78e-03)      |                          |
| SydhTfbsH1hescTbpStd          | N/A                      | <br>E2F4 (1.74e-02)      | <br>GATA1-ext (7.39e-03) |
| SydhTfbsH1hescUsf2Iggrab      | <br>USF (6.23e-05)       | <br>MAX (4.89e-05)       | <br>USF (7.38e-03)       |
| SydhTfbsHct116Pol2Ucd         | N/A                      | <br>NFY (1.58e-05)       | <br>ELF1 (1.45e-02)      |
| SydhTfbsHct116Tcf4Ucd         | <br>TCF7L2 (1.77e-04)    | <br>AP1 (3.99e-05)       | <br>TCF7L2 (2.14e-06)    |
| SydhTfbsHek293bElk4Ucd        | <br>ELF1 (3.06e-02)      | <br>GATA1-ext (1.96e-02) | <br>GATA1-ext (6.84e-03) |
| SydhTfbsHek293bKap1Ucd        | <br>AP1 (9.29e-05)       | N/A                      |                          |
| SydhTfbsHek293bPol2Std        | <br>SP1 (1.15e-05)       | N/A                      | N/A                      |
| SydhTfbsHelas3Ap2alphaStd     | <br>AP2 (4.13e-03)       | N/A                      | <br>AP2 (6.26e-06)       |
| SydhTfbsHelas3Ap2gammaStd     | <br>AP2 (4.5e-03)        | <br>AP2 (1.35e-02)       | <br>AP1 (1.06e-06)       |
| SydhTfbsHelas3Baf155Iggmus    | <br>AP1 (2.93e-05)       | <br>AP1 (8.63e-07)       | <br>CEBPB (1.94e-07)     |
| SydhTfbsHelas3Baf170Iggmus    | <br>AP1 (2.17e-10)       | <br>CEBPB (1.92e-02)     |                          |
| SydhTfbsHelas3Brca1clggrab    | <br>v-JUN (4.25e-05)     | <br>AP1 (1.27e-05)       | <br>UA1 (7.63e-10)       |
| SydhTfbsHelas3CebpbIggrab     | <br>CEBPB (1.47e-03)     | <br>CREB (6.76e-03)      | <br>CEBPB (1.16e-02)     |
| SydhTfbsHelas3CfosStd         | <br>AP1 (2.7e-04)        | <br>AP1 (3.66e-06)       | <br>NFY (7.15e-13)       |
| SydhTfbsHelas3CjunIggrab      | <br>AP1 (1.25e-03)       | <br>AP1 (2.21e-08)       | <br>v-JUN (1.55e-06)     |
| SydhTfbsHelas3CmycStd         | <br>AP1 (4.12e-06)       | <br>MYC (3.82e-05)       | N/A                      |
| SydhTfbsHelas3E2f1Std         | <br>E2F1 (6.81e-03)      | N/A                      | <br>AP1 (8e-04)          |
| SydhTfbsHelas3E2f4Std         | <br>E2F4 (2.72e-11)      | <br>E2F4 (1.07e-02)      | <br>E2F4 (2.37e-03)      |
| SydhTfbsHelas3E2f6Std         | <br>MYC (1.44e-06)       | <br>E2F4 (8.79e-07)      | <br>AP1 (1.48e-03)       |
| SydhTfbsHelas3Elk4Ucd         | <br>ELF1 (3.08e-05)      | <br>ELF1 (6.35e-06)      | <br>AP1 (5.71e-06)       |
| SydhTfbsHelas3Gtf2f1rapIggrab | <br>AP1 (6.31e-10)       | <br>CTCF (7.02e-07)      | <br>CEBPB (2.12e-04)     |
| SydhTfbsHelas3Hae2f1Std       | <br>E2F1 (1.55e-02)      | N/A                      | <br>GATA1-ext (1.46e-02) |
| SydhTfbsHelas3Ini1Iggmus      | <br>AP1 (2.65e-06)       | <br>AP1 (1.46e-03)       | <br>GATA1-ext (3.66e-03) |
| SydhTfbsHelas3Irf3Iggrab      | <br>NFY (2.88e-08)       | <br>NFY-UA2 (3.12e-03)   | <br>GATA1-ext (3.09e-02) |
| SydhTfbsHelas3JundIggrab      | <br>AP1 (9.86e-04)       | <br>AP1 (2e-05)          | <br>v-JUN (3.17e-08)     |

|                               |                                                                                                         |                                                                                                             |                                                                                                             |
|-------------------------------|---------------------------------------------------------------------------------------------------------|-------------------------------------------------------------------------------------------------------------|-------------------------------------------------------------------------------------------------------------|
| SydhTfbsHelas3Mxi1bh1hggrab   | <br>AP1 (1.19e-07)        | <br>MYC (2.19e-06)            | <br>SP1 (6.72e-05)           |
| SydhTfbsHelas3Nrf1lggms       | <br>NRF1 (1.39e-05)     | <br>NRF1 (1.28e-03)         | <br>N/A                    |
| SydhTfbsHelas3P300n15lgrab    | <br>AP1 (8.57e-06)     | <br>CEBPB (1.91e-06)       | <br>AP1 (1.37e-04)        |
| SydhTfbsHelas3Pol2s2lgrab     | <br>N/A                | <br>ESR1 (1.76e-03)        | <br>N/A                   |
| SydhTfbsHelas3Pol2Std         | <br>E2F4 (2.43e-03)    | <br>AP1 (5.54e-05)         |                                                                                                             |
| SydhTfbsHelas3Prdm1vlgrab     | <br>PRDM1 (4.11e-05)   | <br>PRDM1 (1.22e-02)       | <br>PRDM1 (2.84e-07)      |
| SydhTfbsHelas3Rad21lgrab      | <br>CTCF (1.99e-05)    | <br>CTCF (1.12e-04)        | <br>CTCF (3.13e-07)       |
| SydhTfbsHelas3Rfx5n494lgrab   | <br>CTCF (4.97e-05)    | <br>AP1 (2.12e-05)         | <br>CTCF (7.23e-06)       |
| SydhTfbsHelas3Rpc155Std       | <br>B-Box (1.04e-04)   | <br>AP1 (1.28e-04)         | <br>N/A                   |
| SydhTfbsHelas3Smc3ab9263lgrab | <br>CTCF (1.72e-05)    | <br>CTCF (2.37e-05)        | <br>CTCF (4.41e-07)       |
| SydhTfbsHelas3Stat1lfng30Std  | <br>STAT1 (9.83e-05)   | <br>STAT1 (3.35e-03)       | <br>STAT1 (9.94e-08)      |
| SydhTfbsHelas3Stat3lgrab      | <br>AP1 (1.37e-05)     | <br>CEBPB (8.35e-08)       | <br>STAT1 (3.73e-08)      |
| SydhTfbsHelas3Tbplgrab        | <br>AP1 (1.95e-06)     | <br>CEBPB (6.72e-04)       | <br>SP1 (1.09e-03)        |
| SydhTfbsHelas3Tf3c110Std      | <br>B-Box (1.85e-07)   | <br>N/A                    | <br>GATA1-ext (2.21e-02)  |
| SydhTfbsHelas3Tr4Std          | <br>NR2C2 (2.03e-07)   | <br>ESR1 (2.05e-04)        | <br>ELF1 (1.82e-03)       |
| SydhTfbsHelas3Usf2lggms       | <br>USF (2.71e-06)     | <br>MAX (1.05e-05)         | <br>AP1 (8e-08)           |
| SydhTfbsHelas3Znf274Ucd       | <br>E2F4 (2.94e-03)   | <br>GATA1-ext (9.03e-04)  |                                                                                                             |
| SydhTfbsHepg2bTr4Ucd          | <br>NR2C2 (6.65e-11) | <br>ELF1 (1.25e-05)      | <br>RXRA (1.1e-08)      |
| SydhTfbsHepg2CebpbforsklnStd  | <br>CEBPB (7.38e-03) | <br>CEBPB (2.39e-06)     | <br>CEBPB (1.24e-02)    |
| SydhTfbsHepg2Cebpblgrab       | <br>CEBPB (1.38e-02) | <br>CREB (6.87e-03)      | <br>CEBPB (1.11e-05)    |
| SydhTfbsHepg2Chd21250lgrab    | <br>UA1 (5.02e-07)   | <br>ZNF281 (2.84e-04)    | <br>UA1 (1.54e-03)      |
| SydhTfbsHepg2Cjunlgrab        | <br>v-JUN (1.4e-04)  | <br>AP1 (1.35e-03)       | <br>CREB (7.74e-04)     |
| SydhTfbsHepg2ErraForsklnStd   | <br>ESRRA (2.41e-08) | <br>GATA1-ext (1.77e-02) | <br>GATA1-ext (7.5e-03) |
| SydhTfbsHepg2Hnf4aForsklnStd  | <br>HNF4 (4.14e-05)  | <br>HNF4 (6.45e-04)      | <br>RXRA (1.62e-03)     |
| SydhTfbsHepg2Hsf1ForsklnStd   | <br>E2F4 (3e-02)     | <br>HSF1 (1.05e-02)      | <br>N/A                 |
| SydhTfbsHepg2Jundlgrab        | <br>v-JUN (4.5e-05)  | <br>AP1 (1.9e-03)        | <br>AP1 (1.59e-04)      |
| SydhTfbsHepg2Mafm8194lgrab    | <br>v-Maf (7.38e-06) | <br>v-Maf (4.72e-04)     | <br>v-Maf (1.7e-07)     |
| SydhTfbsHepg2Mafkab50322lgrab | <br>v-Maf (1.02e-03) | <br>v-Maf (3.32e-05)     | <br>N/A                 |
| SydhTfbsHepg2Mafksc477lgrab   | <br>v-Maf (2.13e-03) | <br>v-Maf (3.84e-05)     | <br>N/A                 |

|                              |                          |                          |                          |
|------------------------------|--------------------------|--------------------------|--------------------------|
| SydhTfbsHepg2Pol2ForskInStd  | <br>TBP (4.72e-02)       | <br>GATA1-ext (2.98e-02) | <br>RXRA (1.71e-02)      |
| SydhTfbsHepg2Pol2Iggrab      | <br>HNF4 (3.67e-09)      | N/A                      |                          |
| SydhTfbsHepg2Pol2PravastStd  | <br>TBP (3.42e-03)       | <br>GATA1-ext (1.15e-02) | <br>E2F4 (2.26e-03)      |
| SydhTfbsHepg2Rad21Iggrab     | <br>CTCF (7.18e-07)      | <br>CTCF (2.88e-03)      | <br>CTCF (1.05e-07)      |
| SydhTfbsHepg2Rfx5n494Iggrab  | <br>RFX5 (4.92e-05)      | <br>RFX5 (1.15e-03)      | <br>v-JUN (1.57e-05)     |
| SydhTfbsHepg2Sreb1InsInStd   | <br>RFX5 (3.16e-02)      | <br>NFY (8.38e-04)       | <br>TBP (2.49e-02)       |
| SydhTfbsHepg2Tbplggrab       | <br>HNF4 (1.31e-06)      | <br>NFY-UA2 (3.48e-02)   |                          |
| SydhTfbsHepg2Tcf4Ucd         | <br>TCF7L2 (1.54e-03)    | <br>TCF7L2 (4.37e-06)    | <br>FOXA (4.94e-06)      |
| SydhTfbsHepg2Usf2Iggrab      | <br>USF (2.8e-04)        | <br>MAX (1.57e-06)       | <br>USF (3.35e-04)       |
| SydhTfbsHuvecCfosUcd         | <br>AP1 (8.03e-04)       | <br>AP1 (3.15e-03)       | <br>AP1 (3.39e-04)       |
| SydhTfbsHuvecCjunStd         | <br>AP1 (9.47e-04)       | <br>AP1 (2.69e-03)       | <br>v-JUN (2.58e-06)     |
| SydhTfbsHuvecGata2Ucd        | <br>AP1 (1.12e-04)       | <br>ETS1 (1.1e-04)       | <br>N/A                  |
| SydhTfbsHuvecMaxStd          | <br>MAX (3.07e-08)       | <br>MAX (1.08e-03)       | <br>AP1 (2.09e-04)       |
| SydhTfbsHuvecPol2Std         | N/A                      | N/A                      |                          |
| SydhTfbsK562Atf3Std          | <br>USF (1.61e-06)       | <br>TBP (6.44e-03)       | <br>CREB-ext (1.55e-02)  |
| SydhTfbsK562bE2f4Ucd         | <br>E2F4 (1.58e-10)      | <br>GATA1-ext (3.15e-02) | <br>USF (2.32e-02)       |
| SydhTfbsK562bE2f6Ucd         | <br>MYC (3.51e-09)       | <br>E2F4 (3.25e-07)      | <br>E2F4 (1.31e-02)      |
| SydhTfbsK562bGata1Ucd        | <br>GATA1-ext (2.49e-06) | <br>GATA1-ext (2.94e-10) | <br>GATA1-ext (2.22e-04) |
| SydhTfbsK562bGata2Ucd        | <br>GATA1-ext (3.87e-06) | <br>GATA1-ext (3.06e-07) | <br>NFE2 (3.98e-04)      |
| SydhTfbsK562bKap1Ucd         | N/A                      | <br>UA8 (2.53e-02)       | N/A                      |
| SydhTfbsK562Brf2Std          | <br>GATA1-ext (1.91e-03) |                          |                          |
| SydhTfbsK562Brg1Iggms        | <br>GATA1-ext (6.35e-12) | <br>AP1 (6.02e-05)       | <br>GATA1-ext (4.23e-09) |
| SydhTfbsK562bSetdb1MnasedUcd | <br>GATA1-ext (2.79e-02) | <br>GATA1-ext (4.35e-03) |                          |
| SydhTfbsK562bSetdb1Ucd       | <br>GATA1-ext (1.82e-03) | <br>GATA1-ext (8.8e-03)  |                          |
| SydhTfbsK562bTr4Ucd          | N/A                      | <br>GATA1-ext (1.42e-03) | <br>GATA1-ext (5.05e-03) |
| SydhTfbsK562bYy1Ucd          | <br>YY1 (5.06e-06)       | <br>YY1 (2.32e-03)       | <br>YY1 (8.45e-03)       |
| SydhTfbsK562bZnf263Ucd       | <br>ZNF263 (2.79e-02)    | <br>ZNF263 (1.55e-05)    | <br>GATA1-ext (4.21e-02) |
| SydhTfbsK562Cnt2Std          | <br>GATA1-ext (4.8e-11)  | <br>AP1 (7.27e-06)       | <br>GATA1-ext (2.96e-07) |
| SydhTfbsK562CebpIlggrab      | <br>GFI1 (5.71e-03)      | <br>CREB (1.06e-02)      | <br>CEBPB (2.48e-05)     |

|                              |                          |                          |                          |
|------------------------------|--------------------------|--------------------------|--------------------------|
| SydhTfbsK562Chd21250lgrab    | <br>ZNF281 (4.67e-04)    | <br>UA1 (8.38e-07)       | <br>NFY (1.29e-09)       |
| SydhTfbsK562Cjunlfn6hStd     | <br>AP1 (4.24e-04)       | <br>v-JUN (7.39e-07)     | <br>AP1 (3.08e-05)       |
| SydhTfbsK562Cjunlfn30Std     | <br>AP1 (4.44e-04)       | <br>v-JUN (6.57e-07)     | <br>AP1 (4.01e-07)       |
| SydhTfbsK562Cjunlfn6hStd     | <br>AP1 (4.56e-04)       | <br>v-JUN (1.14e-07)     | <br>AP1 (2.99e-05)       |
| SydhTfbsK562CjunStd          | <br>AP1 (1.58e-04)       | <br>v-JUN (4.13e-06)     | <br>AP1 (1.95e-06)       |
| SydhTfbsK562Cmyclfn30Std     | <br>MAX (3.93e-06)       | <br>GATA1-ext (3.19e-07) | <br>MYC (7.48e-03)       |
| SydhTfbsK562Cmyclfn6hStd     | <br>MYC (8.73e-05)       | <br>NFE2 (2.27e-07)      | <br>GATA1-ext (3.51e-14) |
| SydhTfbsK562Cmyclfn30Std     | <br>CTCF (2.32e-03)      | <br>NFE2 (9.29e-08)      | <br>CTCF (3.49e-02)      |
| SydhTfbsK562Cmyclfn6hStd     | <br>MYC (2.69e-05)       | <br>GATA1 (5.91e-06)     | <br>GATA1-ext (2.17e-11) |
| SydhTfbsK562CmycStd          | <br>MYC (8.88e-06)       | <br>N/A                  |                          |
| SydhTfbsK562Gtf2bStd         | <br>EGR1 (2.51e-02)      | <br>GATA1-ext (1.39e-02) | <br>GATA1-ext (3.27e-03) |
| SydhTfbsK562Gtf2f1raplgrab   | <br>TBP (3.46e-02)       | <br>GATA1-ext (2.25e-03) | <br>GATA1-ext (1.85e-02) |
| SydhTfbsK562Hmgn3Std         | <br>GATA1-ext (7.91e-08) | <br>N/A                  | <br>GATA1-ext (8.28e-13) |
| SydhTfbsK562Ini1lggmus       | <br>AP1 (3.18e-04)       | <br>GATA1-ext (3.19e-09) | <br>ESR1 (2.96e-02)      |
| SydhTfbsK562Irf1lfn30Std     | <br>PRDM1 (1.98e-05)     | <br>STAT2 (1.14e-02)     | <br>N/A                  |
| SydhTfbsK562Irf1lfn6hStd     | <br>SP1 (1.63e-05)       | <br>NFY (2.09e-04)       | <br>N/A                  |
| SydhTfbsK562JundStd          | <br>v-JUN (3.9e-05)      | <br>AP1 (1.1e-03)        | <br>RFX5 (2.44e-03)      |
| SydhTfbsK562Mafkab50322lgrab | <br>NFE2 (1.02e-06)      | <br>v-Maf (1.98e-02)     | <br>v-Maf (6.61e-03)     |
| SydhTfbsK562MaxStd           | <br>MAX (2.93e-06)       | <br>MAX (2.68e-03)       | <br>EGR1 (1.43e-03)      |
| SydhTfbsK562Mxi1bhlllgrab    | <br>N/A                  | <br>MYC (7.76e-09)       | <br>GATA1-ext (8.89e-09) |
| SydhTfbsK562Nfe2Std          | <br>NFE2 (1.15e-07)      | <br>NFE2 (3.25e-06)      | <br>N/A                  |
| SydhTfbsK562NfyaStd          | <br>NFY (1.48e-05)       | <br>NFY-UA2 (1.32e-08)   | <br>N/A                  |
| SydhTfbsK562NfybStd          | <br>NFY (5.87e-05)       | <br>NFY-UA2 (5.93e-08)   | <br>N/A                  |
| SydhTfbsK562Nrf1lgrab        | <br>NRF1 (1.87e-06)      | <br>NRF1 (9.96e-03)      | <br>SP1 (2.6e-04)        |
| SydhTfbsK562P300f4lgrab      | <br>GATA1-ext (4.93e-12) | <br>NFE2 (3.17e-07)      | <br>GATA1-ext (1.99e-04) |
| SydhTfbsK562Pol2lfn30Std     | <br>SP1 (7.36e-04)       | <br>ELF1 (4.8e-02)       | <br>N/A                  |
| SydhTfbsK562Pol2lfn6hStd     | <br>N/A                  | <br>GATA1-ext (1.82e-02) | <br>GATA1-ext (4.96e-02) |
| SydhTfbsK562Pol2lfn30Std     | <br>SP1 (9.76e-06)       | <br>ELF1 (1.54e-04)      | <br>E2F4 (3.06e-02)      |
| SydhTfbsK562Pol2lfn6hStd     | <br>N/A                  | <br>MYC (4.29e-02)       | <br>E2F4 (9.35e-03)      |

|                                |                          |                          |                          |
|--------------------------------|--------------------------|--------------------------|--------------------------|
| SydhTfbsK562Pol2Std            | <br>SP1 (2.08e-05)       | <br>AP1 (4.52e-03)       | <br>ELF1 (1.29e-03)      |
| SydhTfbsK562Rad21Std           | <br>CTCF (1.18e-06)      | <br>CTCF (1.81e-03)      | <br>CTCF (4.28e-09)      |
| SydhTfbsK562Rpc155Std          | N/A                      | <br>GATA1-ext (8.49e-03) |                          |
| SydhTfbsK562Sirt6Std           | <br>GATA1-ext (9.12e-14) | <br>BHLHE40 (1.34e-06)   | <br>AP1 (8.82e-03)       |
| SydhTfbsK562Smc3ab9263lgrab    | <br>CTCF (1.61e-07)      | <br>CTCF (9.56e-03)      | <br>CTCF (1.29e-09)      |
| SydhTfbsK562Stat1Ifna30Std     | <br>STAT1 (2.7e-08)      | <br>E2F4 (4.06e-02)      | <br>GATA1-ext (3.56e-06) |
| SydhTfbsK562Stat1Ifna6hStd     | <br>STAT2 (3.32e-07)     | N/A                      | <br>GATA1-ext (3.92e-03) |
| SydhTfbsK562Stat1Ifng30Std     | <br>STAT1 (1.43e-05)     | <br>STAT1 (4.84e-06)     | <br>GATA1-ext (4.47e-02) |
| SydhTfbsK562Stat1Ifng6hStd     | <br>STAT1 (1.26e-05)     | <br>STAT1 (1.39e-05)     | <br>E2F4 (2.11e-03)      |
| SydhTfbsK562Stat2Ifna30Std     | <br>STAT1 (9.14e-09)     | <br>GATA1-ext (1.93e-05) | <br>GATA1-ext (4.48e-07) |
| SydhTfbsK562Stat2Ifna6hStd     | <br>STAT2 (5.74e-07)     | <br>GATA1-ext (5.63e-03) | <br>STAT1 (2.88e-04)     |
| SydhTfbsK562Tal1sc12984lggmus  | <br>GATA1 (8.02e-07)     | <br>GATA1-ext (4.87e-10) | <br>NFE2 (8.46e-04)      |
| SydhTfbsK562Tbplggmus          | <br>SP1 (3.62e-06)       | <br>AP1 (6.12e-06)       | N/A                      |
| SydhTfbsK562Tf3c110Std         | <br>B-Box (1.61e-06)     | <br>E2F4 (1.33e-02)      | <br>GATA1-ext (4.15e-02) |
| SydhTfbsK562Usf2Std            | <br>USF (1.27e-06)       | <br>MAX (1.72e-05)       | <br>NFY (9.64e-07)       |
| SydhTfbsMcf10aesPol2Etoh1Std   | <br>TAL1 (1.55e-02)      | <br>N/A                  | <br>N/A                  |
| SydhTfbsMcf10aesPol2TamStd     | N/A                      | <br>N/A                  | <br>ZNF281 (3.09e-02)    |
| SydhTfbsMcf10aesStat3Etoh1bStd | <br>STAT1 (1.18e-07)     | <br>AP1 (1.89e-05)       | <br>CEBPB (1.5e-08)      |
| SydhTfbsMcf10aesStat3Etoh1cStd | <br>STAT1 (2.03e-07)     | <br>AP1 (6.11e-06)       | <br>CEBPB (2.43e-09)     |
| SydhTfbsMcf10aesStat3Etoh1Std  | <br>STAT1 (8.15e-07)     | <br>AP1 (6.96e-05)       | <br>CEBPB (1.4e-07)      |
| SydhTfbsMcf10aesStat3TamStd    | <br>AP1 (3.47e-05)       | <br>STAT1 (4.72e-07)     | <br>CEBPB (9.42e-06)     |
| SydhTfbsMcf7Hae2f1Ucd          | <br>GATA1-ext (4.86e-03) | <br>E2F4 (1.21e-04)      | <br>AP1 (1.48e-04)       |
| SydhTfbsNb4CmycStd             | <br>MYC (2.18e-05)       | <br>PU1 (8.86e-05)       | <br>CEBPB (1.44e-06)     |
| SydhTfbsNb4MaxStd              | <br>MAX (7.6e-06)        | <br>PU1 (4.31e-05)       | <br>MAX (1.79e-02)       |
| SydhTfbsNb4Pol2Std             | <br>ELF1 (1.26e-02)      | N/A                      | N/A                      |
| SydhTfbsNt2d1Suz12Ucd          | <br>TBP (1.04e-02)       | <br>EGR1 (2.13e-02)      | <br>GATA1-ext (2.44e-02) |
| SydhTfbsNt2d1Yy1Ucd            | <br>YY1 (1.22e-05)       | <br>YY1 (4.12e-04)       | <br>YY1 (1.02e-02)       |
| SydhTfbsNt2d1Znf274Ucd         | <br>UA10 (3.7e-03)       | N/A                      | <br>GATA1-ext (4.09e-02) |
| SydhTfbsPbdeGata1Ucd           | <br>GATA1-ext (3.12e-07) | <br>GATA1 (1.24e-05)     | <br>GATA1-ext (6.36e-04) |

|                               |                          |                          |                          |
|-------------------------------|--------------------------|--------------------------|--------------------------|
| SydhTfbsRajiPol2Ucd           | <br>EGR1 (1.74e-02)      | <br>POU2F2 (7.38e-11)    | <br>N/A                  |
| SydhTfbsShsy5yGata2Ucd        | <br>GATA1 (5.84e-07)     | <br>GATA1-ext (3.54e-12) | <br>N/A                  |
| SydhTfbsTrexhek293Znf263Ucd   | <br>ZNF263 (1.92e-02)    | <br>ZNF263 (2.01e-08)    | <br>CTCF (6.23e-07)      |
| SydhTfbsU2osKap1Ucd           | <br>AP1 (1.09e-04)       | <br>v-JUN (3.51e-06)     | <br>N/A                  |
| SydhTfbsU2osSetdb1Ucd         | <br>GATA1-ext (5.57e-03) | <br>N/A                  |                          |
| UchicagoTfbsK562EfosControl   | <br>AP1 (1.28e-03)       | <br>AP1 (2.2e-03)        | <br>AP1 (2.04e-03)       |
| UchicagoTfbsK562Egata2Control | <br>GATA1-ext (1.78e-05) | <br>NFE2 (5.8e-09)       | <br>GATA1-ext (1.86e-11) |
| UchicagoTfbsK562EjunbControl  | <br>AP1 (1.65e-04)       | <br>AP1 (1.08e-06)       | <br>v-JUN (1.56e-06)     |
| UchicagoTfbsK562EjundControl  | <br>NFE2 (6.39e-04)      | <br>v-JUN (2.82e-06)     | <br>AP1 (1.1e-05)        |
| UwTfbsAg04449CtcfStd          | <br>CTCF (4.97e-05)      | <br>CTCF (5e-04)         | <br>CTCF (3e-06)         |
| UwTfbsAg04450CtcfStd          | <br>CTCF (2.36e-04)      | <br>CTCF (1.2e-02)       | <br>CTCF (1.61e-06)      |
| UwTfbsAg09309CtcfStd          | <br>CTCF (1.76e-04)      | <br>CTCF (7.67e-03)      | <br>CTCF (2.42e-06)      |
| UwTfbsAg09319CtcfStd          | <br>CTCF (6.75e-05)      | <br>CTCF (2.29e-03)      | <br>CTCF (1.52e-06)      |
| UwTfbsAg10803CtcfStd          | <br>CTCF (1.58e-04)      | <br>CTCF (7.05e-03)      | <br>CTCF (7.45e-06)      |
| UwTfbsAoaafCtcfStd            | <br>CTCF (2.05e-04)      | <br>CTCF (4.61e-04)      | <br>CTCF (2.76e-06)      |
| UwTfbsBjCtcfStd               | <br>CTCF (1.58e-04)      | <br>CTCF (5.77e-03)      | <br>N/A                  |
| UwTfbsCaco2CtcfStd            | <br>CTCF (1.72e-04)      | <br>CTCF (4.04e-03)      | <br>CTCF (1.7e-05)       |
| UwTfbsGm06990CtcfStd          | <br>CTCF (9.69e-04)      | <br>CTCF (6.47e-03)      | <br>CTCF (2.88e-07)      |
| UwTfbsGm12801CtcfStd          | <br>CTCF (6.25e-07)      | <br>CTCF (1.53e-02)      | <br>GATA1-ext (2.78e-04) |
| UwTfbsGm12864CtcfStd          | <br>CTCF (5.28e-04)      | <br>CTCF (1.07e-02)      | <br>CTCF (6.69e-07)      |
| UwTfbsGm12865CtcfStd          | <br>CTCF (1.15e-04)      | <br>CTCF (1.57e-02)      | <br>CTCF (3.06e-04)      |
| UwTfbsGm12872CtcfStd          | <br>CTCF (1.7e-04)       | <br>CTCF (1.8e-02)       | <br>N/A                  |
| UwTfbsGm12873CtcfStd          | <br>CTCF (5.52e-05)      | <br>CTCF (4.75e-03)      | <br>CTCF (3.96e-03)      |
| UwTfbsGm12874CtcfStd          | <br>CTCF (2.05e-04)      | <br>CTCF (1.5e-02)       | <br>CTCF (5.35e-07)      |
| UwTfbsGm12875CtcfStd          | <br>CTCF (2.29e-04)      | <br>CTCF (6.93e-03)      | <br>N/A                  |
| UwTfbsGm12878CtcfStd          | <br>CTCF (1.05e-03)      | <br>CTCF (7.26e-03)      | <br>CTCF (2.64e-06)      |
| UwTfbsHaspCtcfStd             | <br>CTCF (1.9e-05)       | <br>CTCF (2.89e-03)      | <br>N/A                  |
| UwTfbsHbmecCtcfStd            | <br>CTCF (4.13e-04)      | <br>CTCF (8.32e-03)      | <br>CTCF (3.78e-08)      |
| UwTfbsHcfaaCtcfStd            | <br>CTCF (1.57e-04)      | <br>CTCF (2.3e-03)       | <br>CTCF (1.08e-06)      |

|                      |                                                                                                    |                                                                                                    |                                                                                                     |
|----------------------|----------------------------------------------------------------------------------------------------|----------------------------------------------------------------------------------------------------|-----------------------------------------------------------------------------------------------------|
| UwTfbsHeeCtcfStd     |  CTCF (3.68e-05)     |  CTCF (4.83e-04)     |  CTCF (7.14e-07)     |
| UwTfbsHek293CtcfStd  |  CTCF (5.14e-04)   |  CTCF (6.79e-03)   |  CTCF (2.02e-06)   |
| UwTfbsHela3CtcfStd   |  CTCF (3.64e-04)  |  CTCF (1.43e-02)  |  CTCF (1.44e-05)  |
| UwTfbsHepg2CtcfStd   |  CTCF (9.69e-05)  |  CTCF (3.66e-03)  |  CTCF (3.47e-07)  |
| UwTfbsHl60CtcfStd    |  CTCF (4e-05)     |  CTCF (6.33e-03)  |  CTCF (3.88e-04)  |
| UwTfbsHmecCtcfStd    |  CTCF (1.77e-05)  |  CTCF (1.06e-03)  |  CTCF (9.36e-03)  |
| UwTfbsHmfCtcfStd     |  CTCF (9.79e-04)  |  CTCF (1.13e-02)  |  CTCF (1.64e-05)  |
| UwTfbsHpaCtcfStd     |  CTCF (3.73e-04)  |  CTCF (6.85e-03)  |  N/A              |
| UwTfbsHpfCtcfStd     |  CTCF (7.25e-05)  |  CTCF (2.2e-03)   |  CTCF (1.55e-06)  |
| UwTfbsHreCtcfStd     |  CTCF (2.96e-05)  |  CTCF (9.51e-03)  |  CTCF (1.16e-02)  |
| UwTfbsHrpeCtcfStd    |  CTCF (2.56e-04)  |  CTCF (4.67e-03)  |  CTCF (3.7e-08)   |
| UwTfbsHuvecCtcfStd   |  CTCF (6.77e-05)  |  CTCF (4.03e-03)  |  CTCF (4.57e-02)  |
| UwTfbsK562CtcfStd    |  CTCF (1.32e-04)  |  CTCF (7.2e-03)   |  CTCF (2.26e-07)  |
| UwTfbsNhekCtcfStd    |  CTCF (9.91e-05)  |  CTCF (6.1e-03)   |  CTCF (6.94e-05)  |
| UwTfbsSaecCtcfStd    |  CTCF (7.67e-05)  |  CTCF (3.28e-03)  |  CTCF (5.41e-08)  |
| UwTfbsSknshraCtcfStd |  CTCF (2.77e-04)  |  CTCF (1.39e-02)  |  CTCF (3.39e-06)  |
| UwTfbsWerirb1CtcfStd |  CTCF (1.25e-05) |  CTCF (1.34e-02) |  CTCF (4.96e-02) |
