# Supplementary material for: Enhanced Regulatory Sequence Prediction Using Gapped k-mer Features
Source: PubMed Central journal article supplement (PMC4102394; doi:10.1371/journal.pcbi.1003711), 2014-07-17
Supplement: pcbi.1003711.s014.pdf [file pcbi.1003711.s014.pdf]

## Numerical Example

In this section, we present a numerical example that depicts the use of the equations. Let  $S_1 = \text{AAACCC}$ ,  $S_2 = \text{ACC}$  be two sequences with lengths  $n_1 = 6$  and  $n_2 = 3$ . For simplicity, assume that the sequences are defined over the alphabet  $\pi = \{A, C\}$  with size  $b = 2$ . Given  $l = 3$  and  $k = 2$ , Table S1 shows the counts for all  $b^l$  possible  $l$ -mers, and Table S2 shows the counts for all  $\binom{l}{k} b^k$  possible gapped  $k$ -mers of length  $l$  defined over the alphabet  $\pi$  for  $S_1$  and  $S_2$ . Given  $l = 3$ ,  $k = 2$  and  $b = 2$ , Equation (6) gives the weight corresponding to different number of mismatches:  $w_0 = 7/24$ ,  $w_1 = -2/24$ ,  $w_2 = 1/24$  needed to calculate  $l$ -mer count estimates from gapped  $k$ -mer counts. For example, to calculate the estimated count for AAA, we have:

$$\hat{x}_{AAA} = w_0(N_{nAA} + N_{AnA} + N_{AAAn}) + w_1(N_{nAC} + N_{nCA} + N_{AnC} + N_{CnA} + N_{ACn} + N_{CAn}) + w_2(N_{nCC} + N_{CnC} + N_{CCn})$$

Therefore, given the gapped  $k$ -mer counts in Table S2, the count estimate for AAA in sequence  $S_1$  is  $\frac{7}{24}(1+1+2) - \frac{2}{24}(1+0+2+0+1+0) + \frac{1}{24}(2+1+1) = 1$ . The count estimates can be calculated more efficiently without the need to compute the gapped  $k$ -mer counts by using Equation (11). For example, to compute the count estimate for  $u = \text{AAA}$  in  $S_1$ , we compare it with all the  $l$ -mers in  $S_1$  which are  $\{\text{AAA}, \text{AAC}, \text{ACC}, \text{CCC}\}$  and count the number of  $l$ -mers in  $S_1$  with 0,1,2, and 3 mismatches. Here there is one  $l$ -mer with perfect match (AAA), one  $l$ -mer with one mismatch (AAC), one with two mismatches (ACC) and one with three mismatches (CCC), hence we have  $\hat{x}_{AAA} = 1g_0 + 1g_1 + 1g_2 + 1g_3$ . The weights for different number of mismatches are given by Equation (10):  $g_0 = 7/8$ ,  $g_1 = 1/8$ ,  $g_2 = -1/8$ ,  $g_3 = 1/8$ . Therefore,  $\hat{x}_{AAA} = 1$ , which is consistent to the result from using the gapped  $k$ -mer counts and  $w_m$ 's. To ensure that the estimated count is non-negative, we truncate the filter  $g_m$ . In this example, for truncated  $g$ , we have  $g_{tr,0} = 7/8$ ,  $g_{tr,1} = 1/8$ ,  $g_{tr,2} = 0$ ,  $g_{tr,3} = 0$ . Table S3 shows the count estimates for all the  $l$ -mers in  $S_1$  and  $S_2$  using  $g$  and  $g_{tr}$ .

Now, for obtaining the  $l$ -mer count estimate similarity score (gkm-kernel with truncated filter) between sequences  $S_1$  and  $S_2$ , we need to find the inner product of the count estimates vectors. Using count estimates from Table 3, we obtain  $\langle f^{S_1}, f^{S_2} \rangle = 1 \times 0 + \frac{9}{8} \times \frac{1}{8} + \frac{1}{4} \times \frac{1}{8} + \frac{9}{8} \times \frac{7}{8} + \frac{1}{8} \times 0 + \frac{1}{4} \times 0 + \frac{1}{8} \times 0 + 1 \times \frac{1}{8} = \frac{41}{32}$ .

We can more efficiently calculate this inner product directly from the sequences of  $S_1$  and  $S_2$  without the need to compute the  $l$ -mer count estimates vectors. For this, we compare every  $l$ -mers in  $S_1$  with every  $l$ -mers in  $S_2$  and count the number of pairs with 0, 1, 2, and 3 mismatches. Here we have one pair with perfect match (ACC, ACC), two pairs with one mismatch  $\{(\text{AAC}, \text{ACC}), (\text{CCC}, \text{ACC})\}$ , one pair with two mismatches (AAA, ACC), and no pairs with three mismatches. Hence, the mismatch profile between  $S_1$  and  $S_2$  is given by  $\{1, 2, 1, 0\}$ . Using Equation (14), the weights  $c_0 = 26/32$ ,  $c_1 = 7/32$ ,  $c_2 = 1/32$ , and  $c_3 = 0$  are obtained. Hence

$$\langle f^{S_1}, f^{S_2} \rangle = 1 \times \frac{26}{32} + 2 \times \frac{7}{32} + 1 \times \frac{1}{32} + 0 \times 0 = \frac{41}{32}, \text{ which is consistent with the result above. Similarly, for}$$

computing the inner product of the gapped  $k$ -mer count vectors, using gapped  $k$ -mer counts from Table S2, we have:  $\langle f_g^{S_1}, f_g^{S_2} \rangle = 1 \times 0 + 1 \times 0 + 0 \times 0 + 2 \times 1 + 1 \times 0 + 2 \times 1 + 0 \times 0 + 1 \times 0 + 2 \times 0 + 1 \times 1 + 0 \times 0 + 1 \times 0 = 5$ . This

inner product can be more efficiently found by using weights given in Equation  $h_m = \binom{l-m}{k}$  with the above

mismatch profile. We have  $h_0 = 3$ ,  $h_1 = 1$ ,  $h_2 = 0$ , and  $h_3 = 0$ . Hence:  $\langle f_g^{S_1}, f_g^{S_2} \rangle = 1 \times 3 + 2 \times 1 + 1 \times 0 + 0 \times 0 = 5$ , which is also consistent with the result above.

**Table S1. Example of  $l$ -mer count table**

| $l$ -mer | count in $S_1$ | count in $S_2$ |
|----------|----------------|----------------|
| AAA      | 1              | 0              |
| AAC      | 1              | 0              |
| ACA      | 0              | 0              |
| ACC      | 1              | 1              |
| CAA      | 0              | 0              |
| CAC      | 0              | 0              |
| CCA      | 0              | 0              |
| CCC      | 1              | 0              |

**Table S2. Example of gapped  $k$ -mer count table**

| gapped $k$ -mer | count in $S_1$ | count in $S_2$ |
|-----------------|----------------|----------------|
| nAA             | 1              | 0              |
| nAC             | 1              | 0              |
| nCA             | 0              | 0              |
| nCC             | 2              | 1              |
| AnA             | 1              | 0              |
| AnC             | 2              | 1              |
| CnA             | 0              | 0              |
| CnC             | 1              | 0              |
| AA <sub>n</sub> | 2              | 0              |
| AC <sub>n</sub> | 1              | 1              |
| CA <sub>n</sub> | 0              | 0              |
| CC <sub>n</sub> | 1              | 0              |

**Table S3. Example of count estimates**

| $l$ -mer | count estimate in $S_1$ |           | count estimate in $S_2$ |           |
|----------|-------------------------|-----------|-------------------------|-----------|
|          | Full                    | truncated | Full                    | truncated |
| AAA      | 1                       | 1         | -1/8                    | 0         |
| AAC      | 1                       | 9/8       | 1/8                     | 1/8       |
| ACA      | 0                       | 1/4       | 1/8                     | 1/8       |
| ACC      | 1                       | 9/8       | 7/8                     | 7/8       |
| CAA      | 0                       | 1/8       | 1/8                     | 0         |
| CAC      | 0                       | 1/4       | -1/8                    | 0         |
| CCA      | 0                       | 1/8       | -1/8                    | 0         |
| CCC      | 1                       | 1         | 1/8                     | 1/8       |
